# Supplementary material for: Theragnostic Use of Radiolabelled Dota-Peptides in Meningioma: From Clinical Demand to Future Applications
Source: PubMed Central journal article supplement (PMC6826849; doi:10.3390/cancers11101412), 2019-09-22

# Supplementary Materials: Theragnostic Use of Radiolabeled Dotapeptides in Meningioma: From the Clinical Demand to Future Applications.

Riccardo Laudicella, Domenico Albano, Salvatore Annunziata, Diletta Calabrò, Giovanni Argiroffi, Elisabetta Abenavoli, Flavia Linguanti, Domenico Albano, Antonio Vento, Antonio Bruno, Pierpaolo Alongi and Matteo Bauckneht

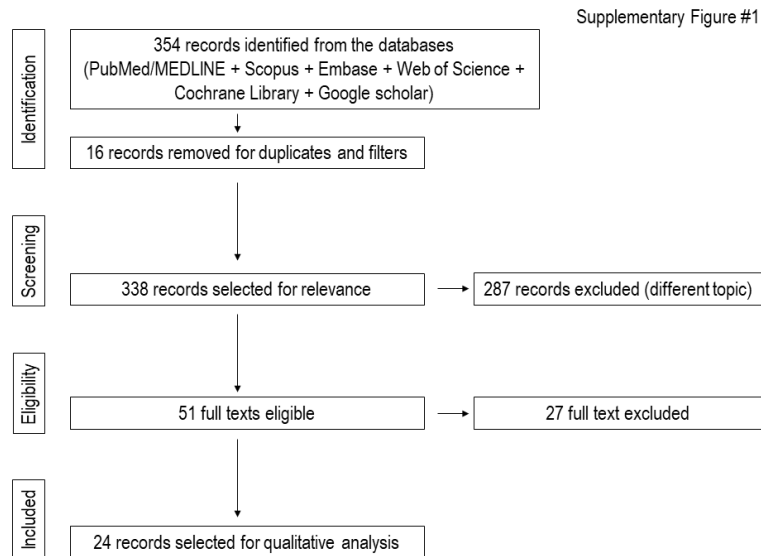

Figure S1. PRISMA flow-chart for dota-peptide's diagnostic use.

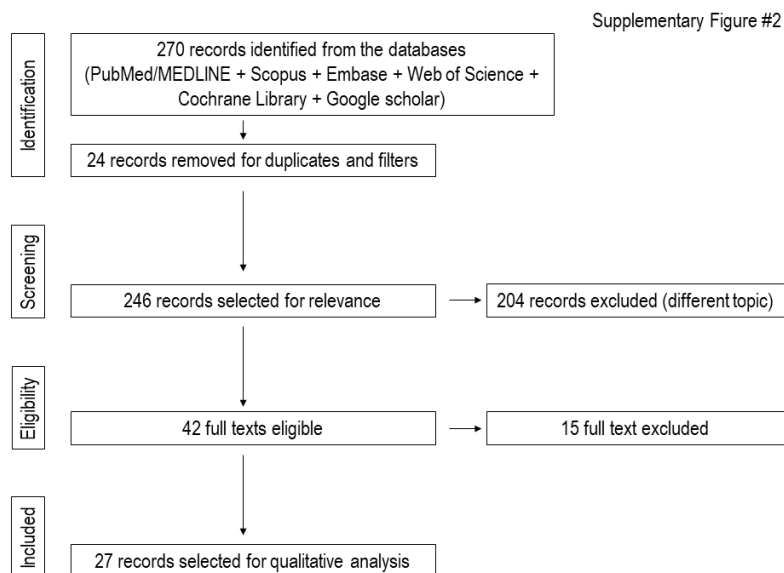

Figure S2. PRISMA flow-chart for dota-peptide's therapeutic use.

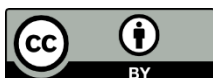

Supplement: cancers-11-01412-s001.pdf [file cancers-11-01412-s001.pdf]
